# Supplementary material for: Revisiting Clustered Microarchitecture for Future Superscalar Cores
Source: Atypon-hosted journal article supplement (doi:10.1145/2800787), 2015-08-31
Supplement: taco1203-28.pdf [file 2800787&file=taco1203-28.pdf]

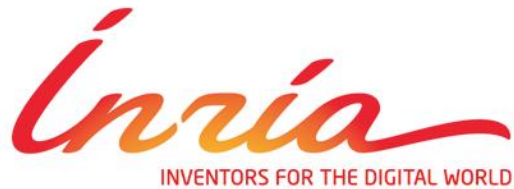

# Revisiting Clustered Microarchitecture for Future Superscalar Cores: A Case for Wide Issue Clusters

*P. Michaud, A. Mondelli, A. Sez nec*

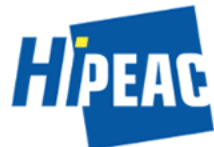

**2016 Conference**

*January 18-20, 2016, Prague, Czech Republic*

# Motivations

**Multicore system**

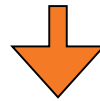

benefits applications with thread-level

**Reality**

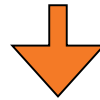

\*most applications have low thread-level  
parallelism

# Table of contents

**Quantity**

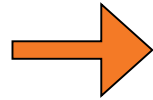

Potential IPC gain  
?

**Quality**

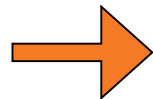

In which way we  
should proceed ?

**Solutions**

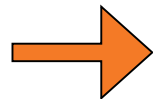

Future of superscalar  
architecture

# Simulation Environment

- *in-house simulator based on Pin (el)*
- *benchmarks used SPEC CPU 2006*
- *1 billion insts simulated (20 samples x 50 millions)*
- *aggressive Haswell-like baseline*

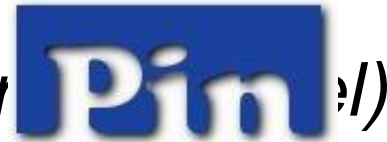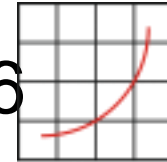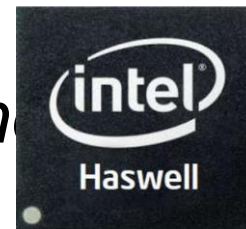

# Future Potential IPC Gain

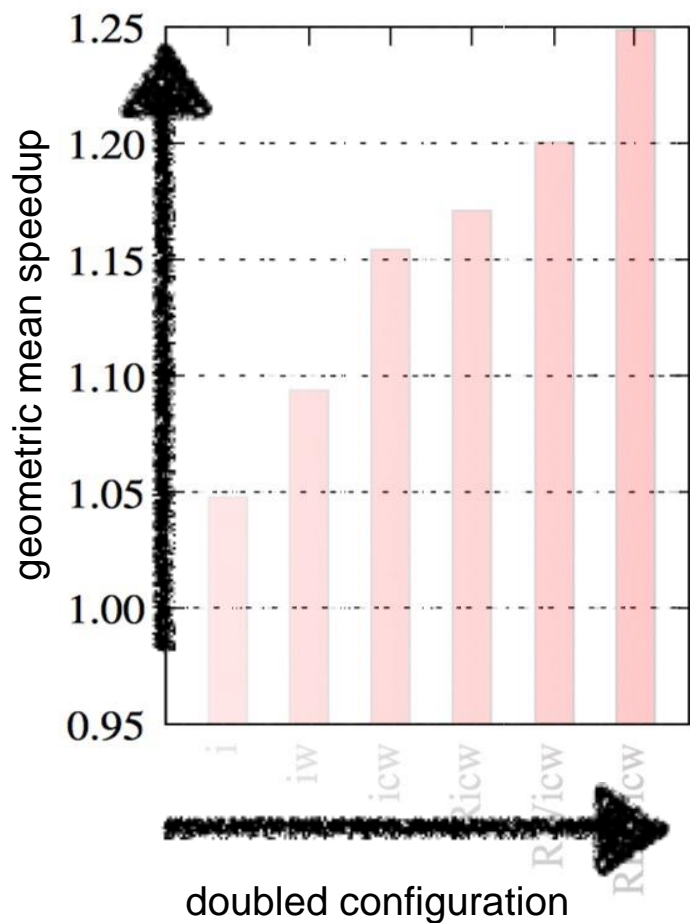

- *7 different parameters*
- *128 configurations*
- *highest speedup per configuration*

# Future Potential IPC Gain



- *7 different parameters*
- *128 configurations*
- *highest speedup per configuration*

The extra complexity can be introduced incrementally

# Future Potential IPC Gain

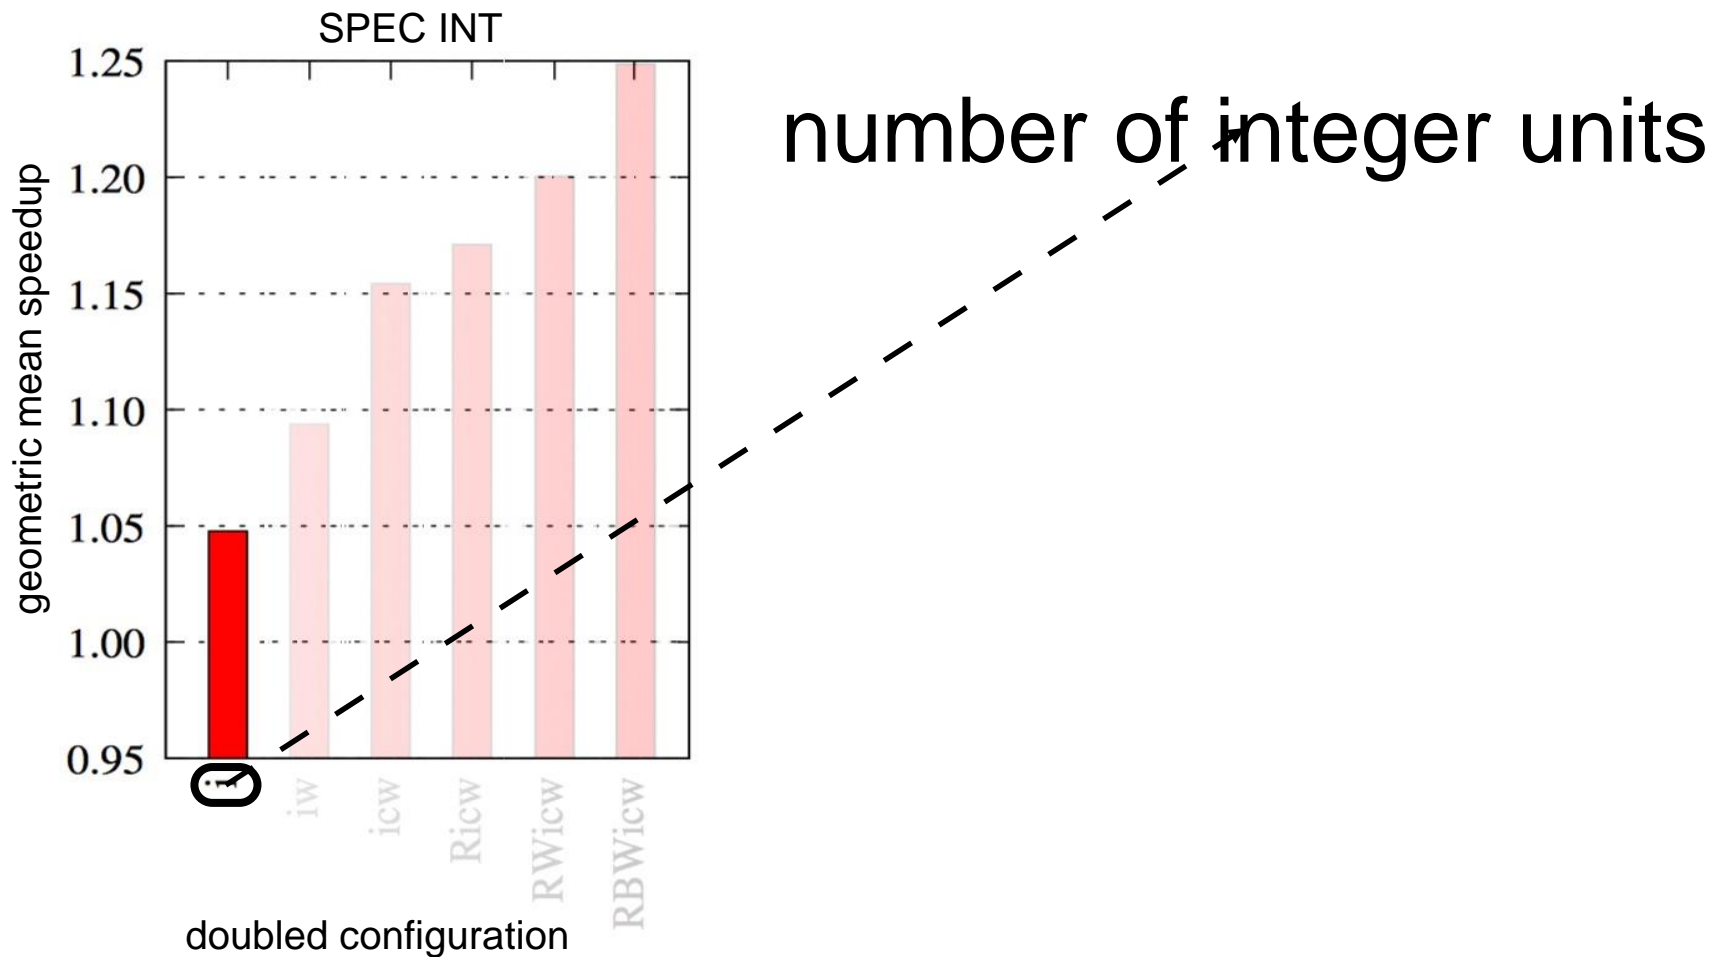

# Future Potential IPC Gain

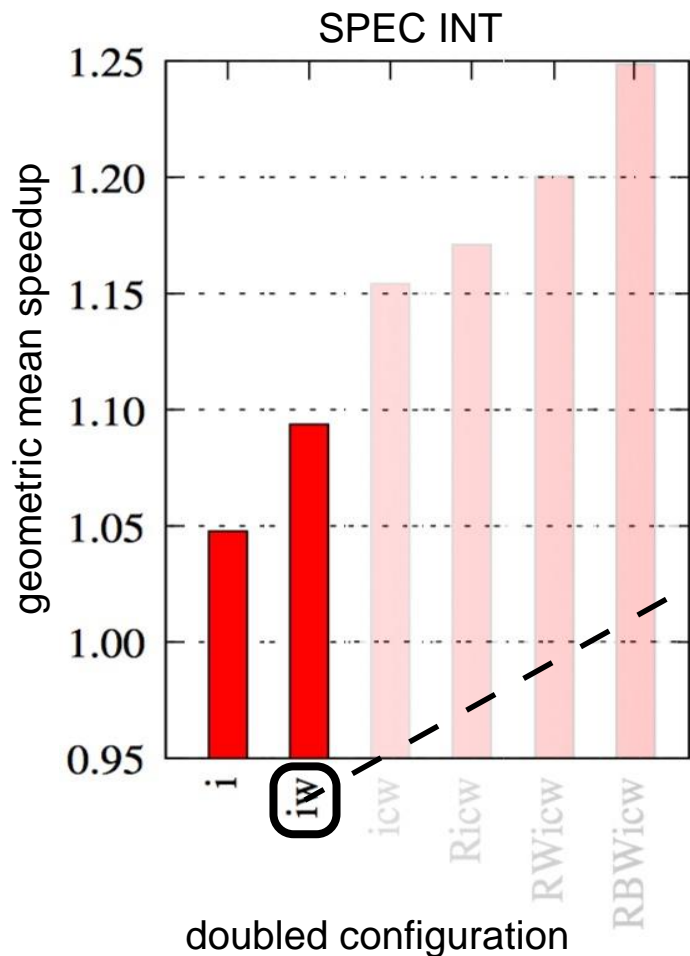

number of integer units  
+  
front-end width



# Future Potential IPC Gain

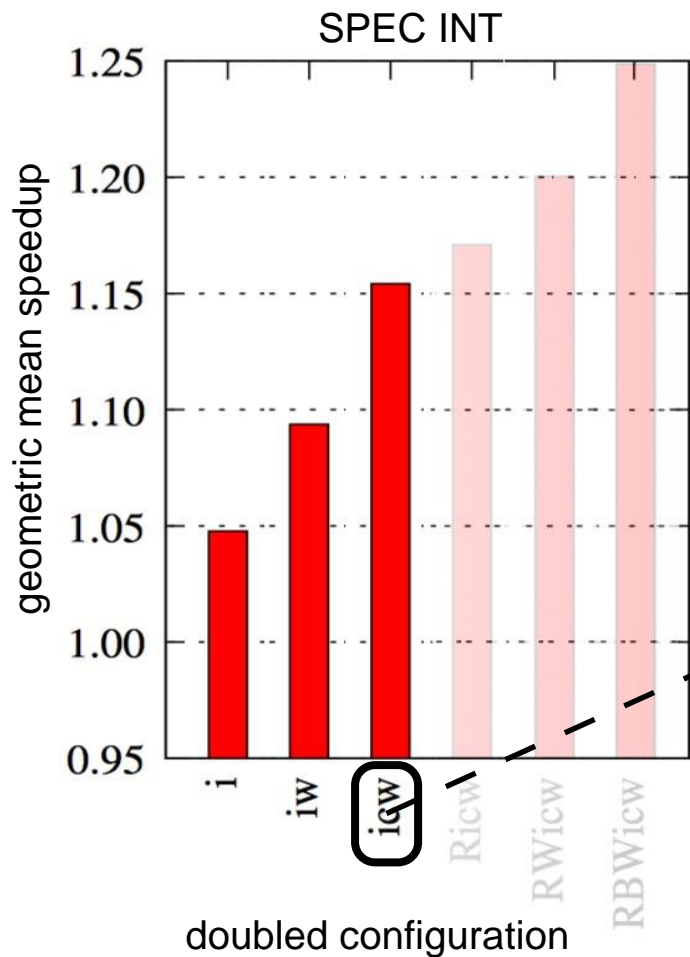

number of integer units  
+  
front-end width  
+  
memory parameters\*

\*memory = load issue + DL1 write ports

# Future Potential IPC Gain

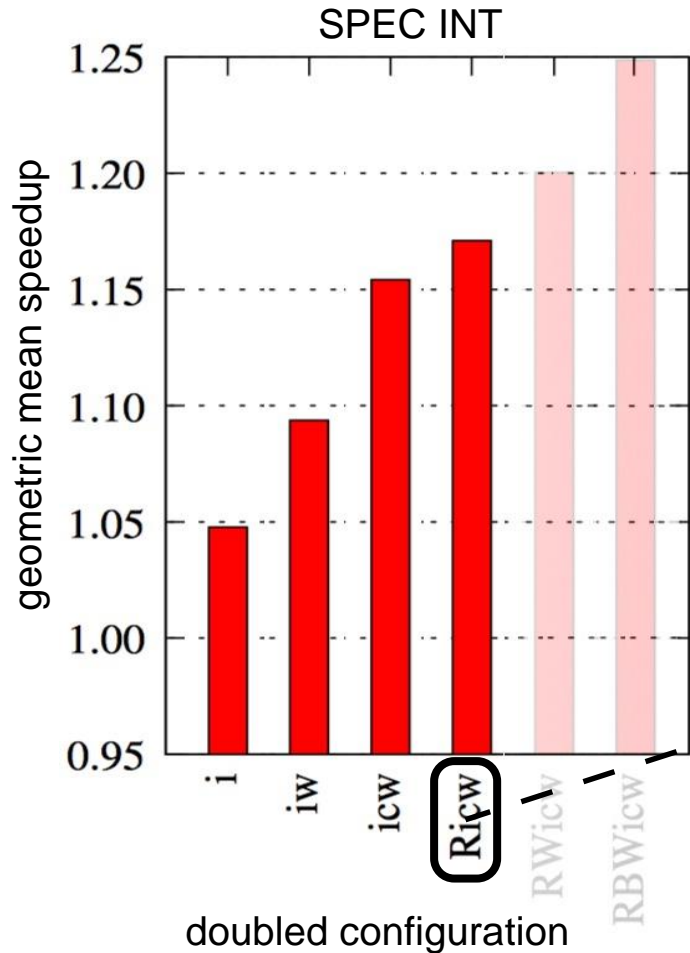

number of integer units  
+  
front-end width  
+  
memory parameters\*  
+  
physical register file

\*memory = load issue + DL1 write ports

# Future Potential IPC Gain

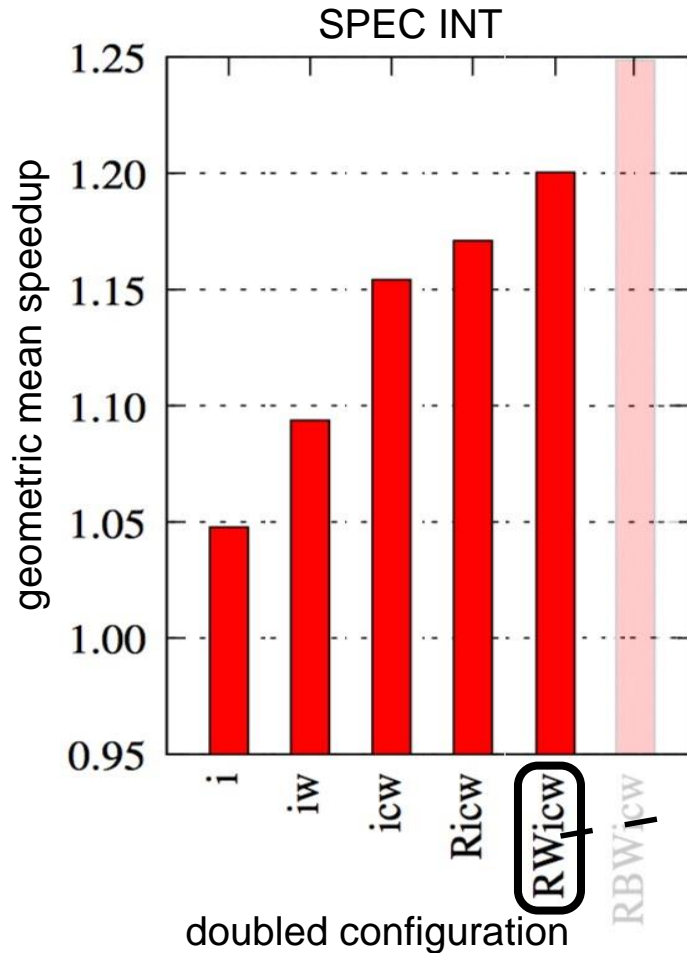

number of integer units  
+  
front-end width  
+  
memory parameters\*  
+  
physical register file  
+  
instruction window\*

\*memory = load issue + DL1 write ports

\*instruction window = ROB + L/S queue + LFST + MSHR

# Future Potential IPC Gain

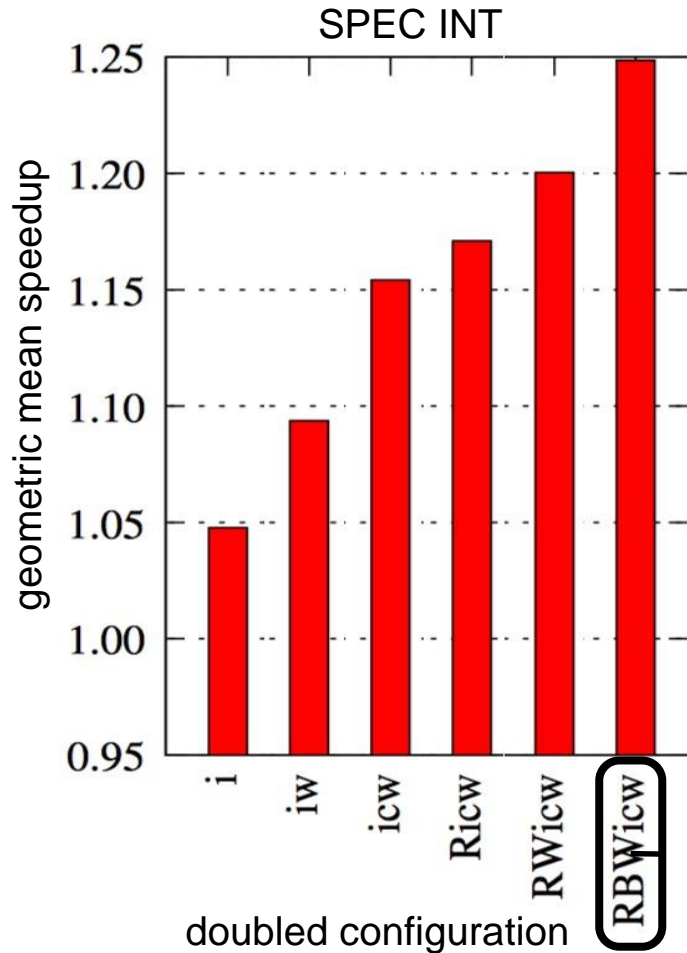

number of integer units  
+  
front-end width  
+  
memory parameters\*  
+  
physical register file  
+  
instruction window\*  
+  
issue buffer

\*memory = load issue + DL1 write ports

\*instruction window = ROB + L/S queue + LFST + MSHR

# Future of Superscalar

Increase of

- Instruction Window
- Issue Width
- ~~→~~ HW complexity

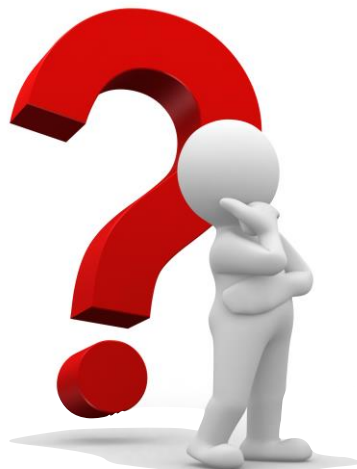

# Future of Superscalar

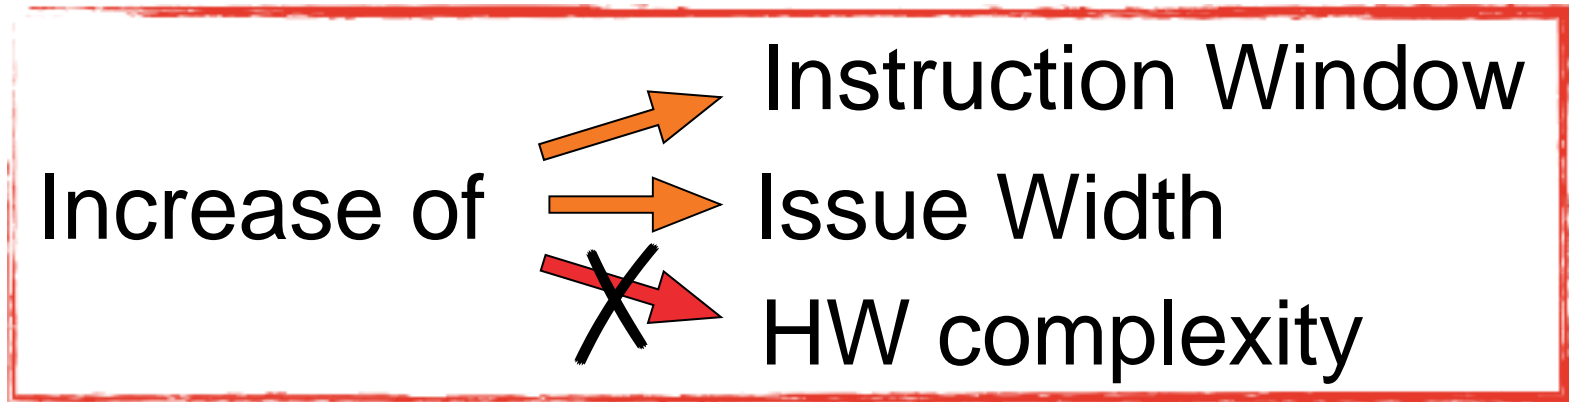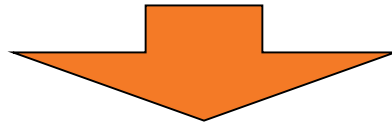

Clustering + Register Write Specialization

# Clustering

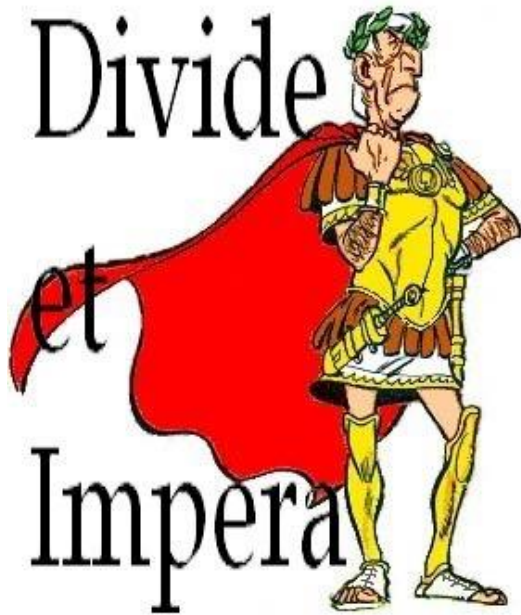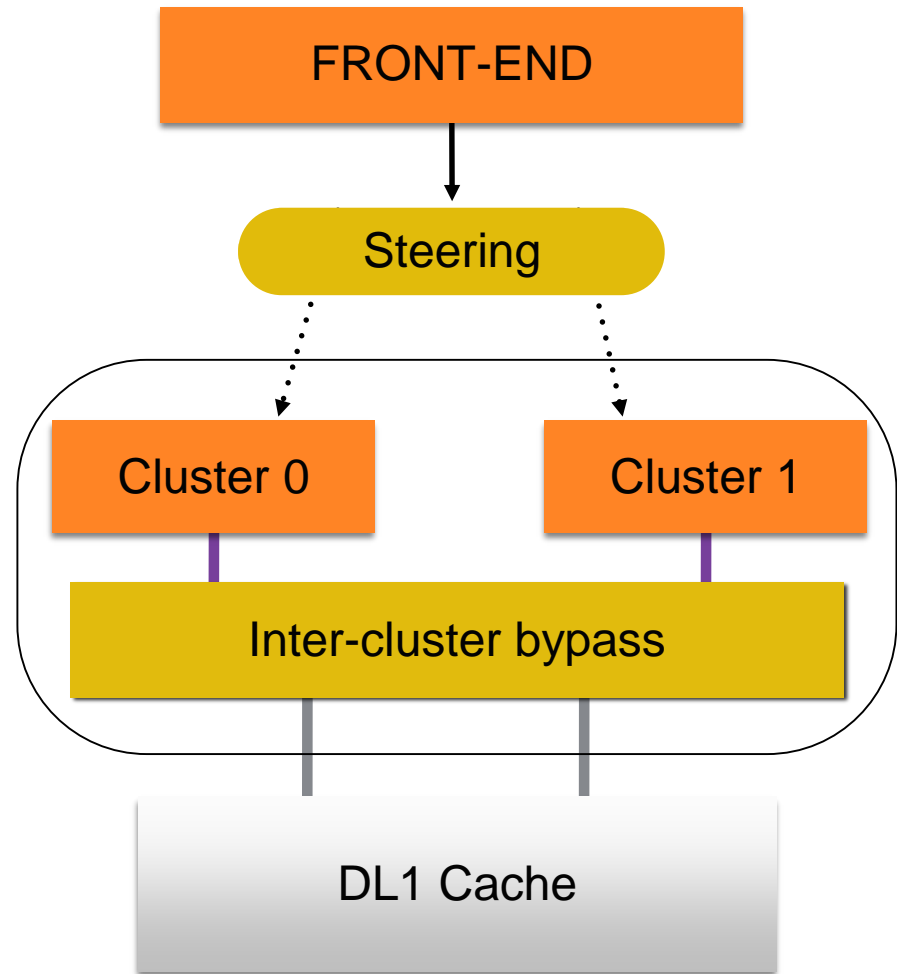

# Clustering

## Steering Policy: Mod-N

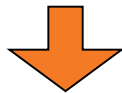

This scheme sends  
alternatively  
**N** instruction  
to each cluster





# Register Write Specialization

**Each cluster:**

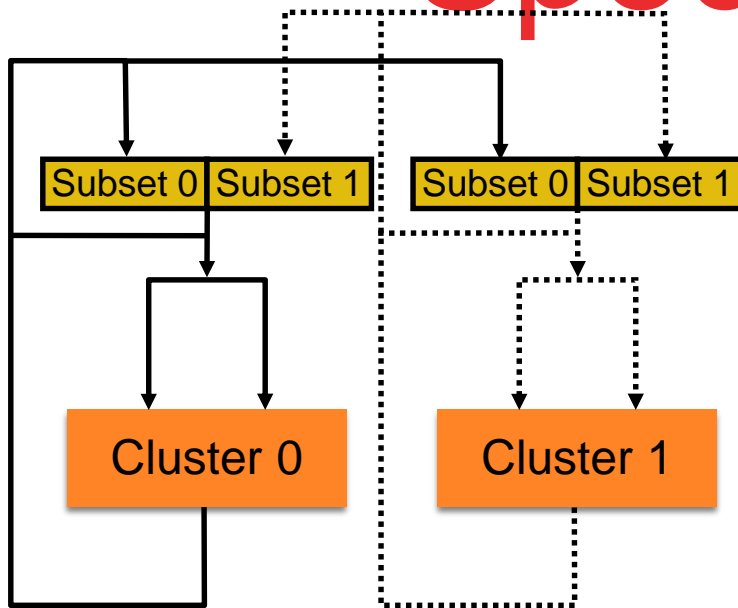

- *can write in its own register file partition*
- *has a mirror copy of the other register file partition*
- *we can keep the same numbers of write ports*

# Register Write Specialization

Each cluster:



- *can write in its own register file partition*
- *has a mirror copy of the other register file partition*
- *we can keep the same numbers of write ports*

steering should be finished before register

~~Register Write Specialization~~ has no impact on final performances

# Dual Cluster Performance

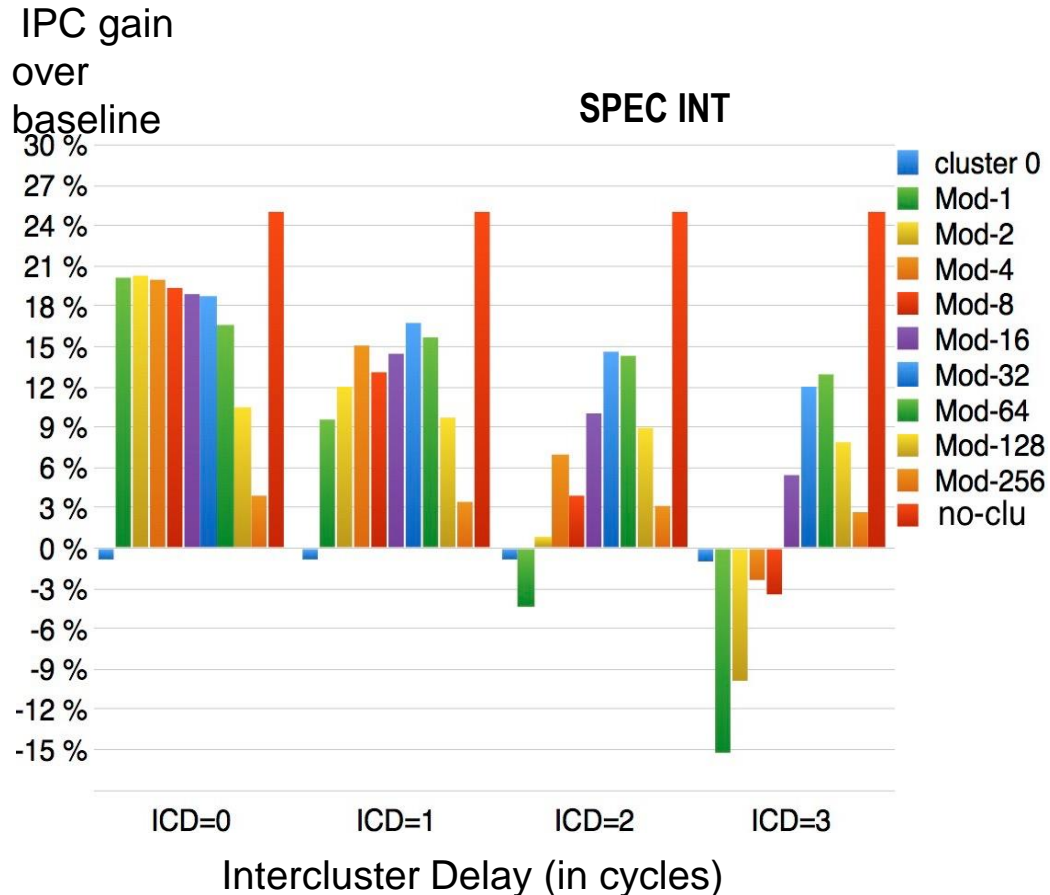

- *front-end doubled*
- *back-end doubled*
- *instruction window doubled*
- *DL1 latency from 3 to 4 cycles*

# Dual Cluster Performance

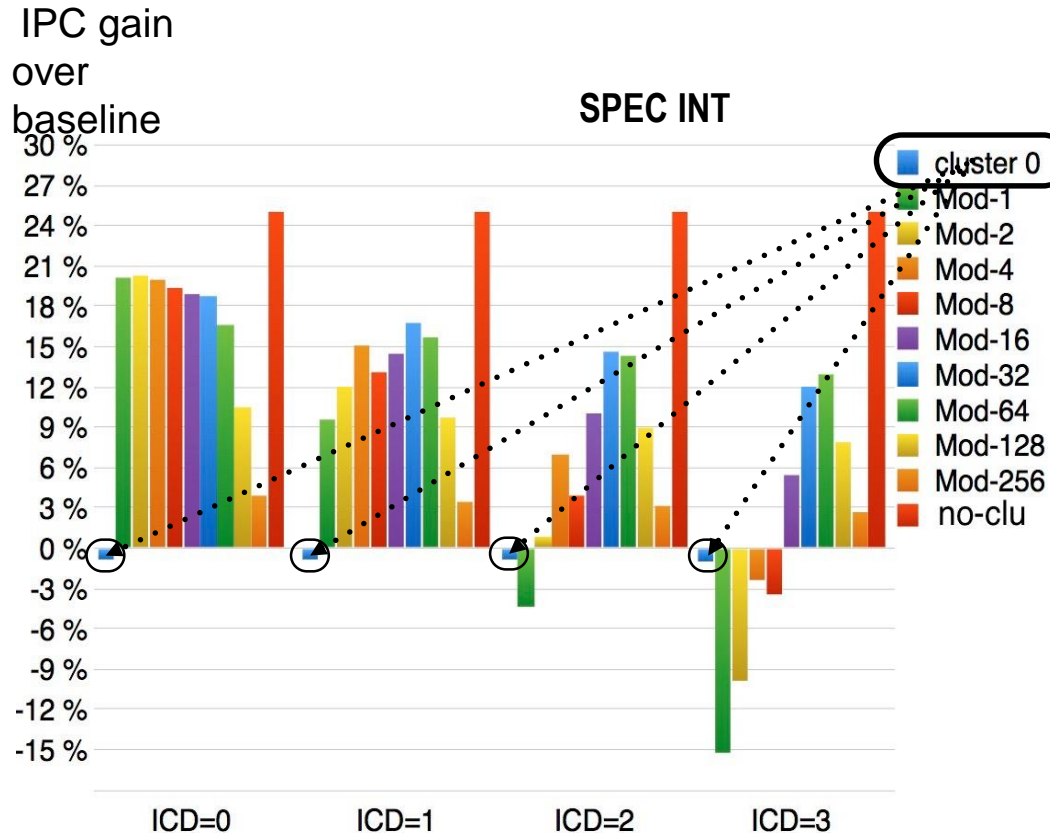

steering all uops to cluster 0

impact of DL1 compensated by ROB and MSHRs

# Dual Cluster Performance

IPC gain  
over  
baseline

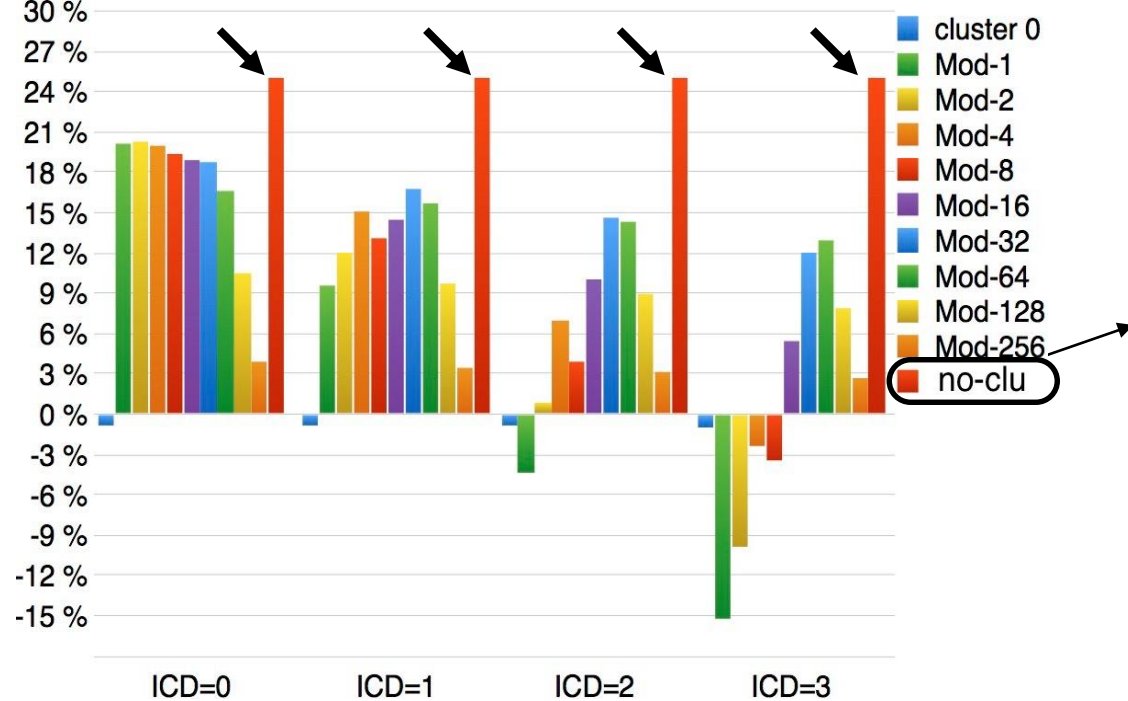

idealistic  
architecture

# Dual Cluster Performance

IPC gain  
over  
baseline

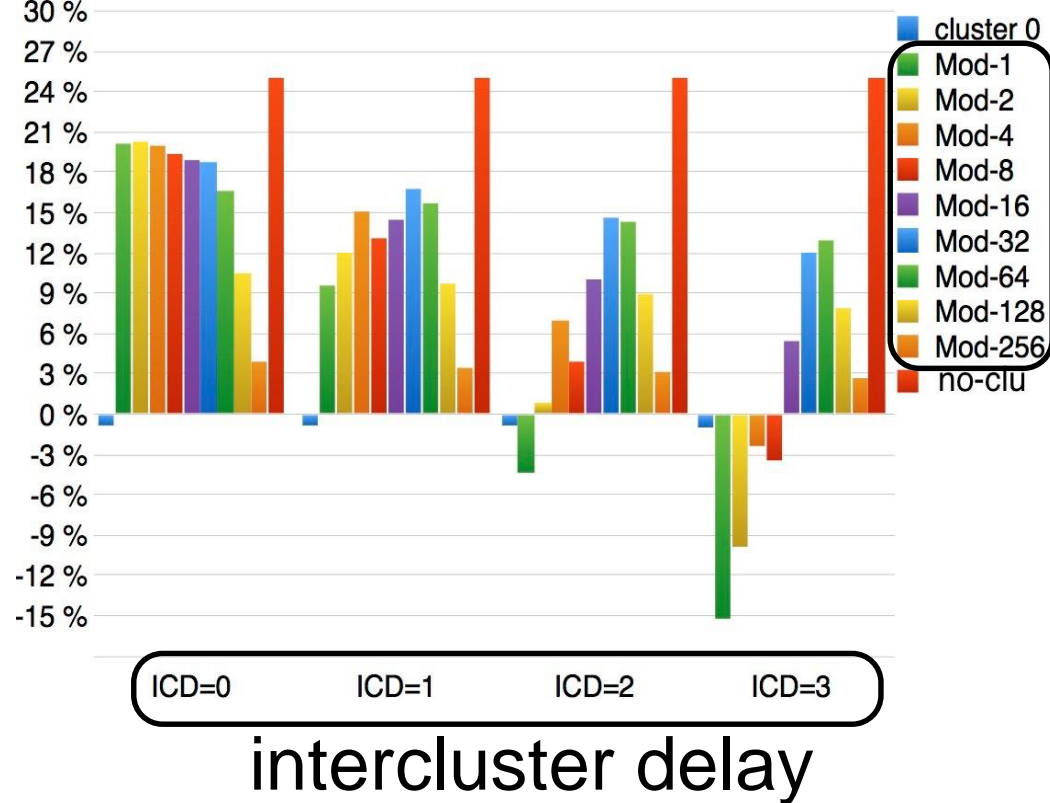

incremental  
increase of  
Mod-N

# Dual Cluster Performance

IPC gain  
over  
baseline

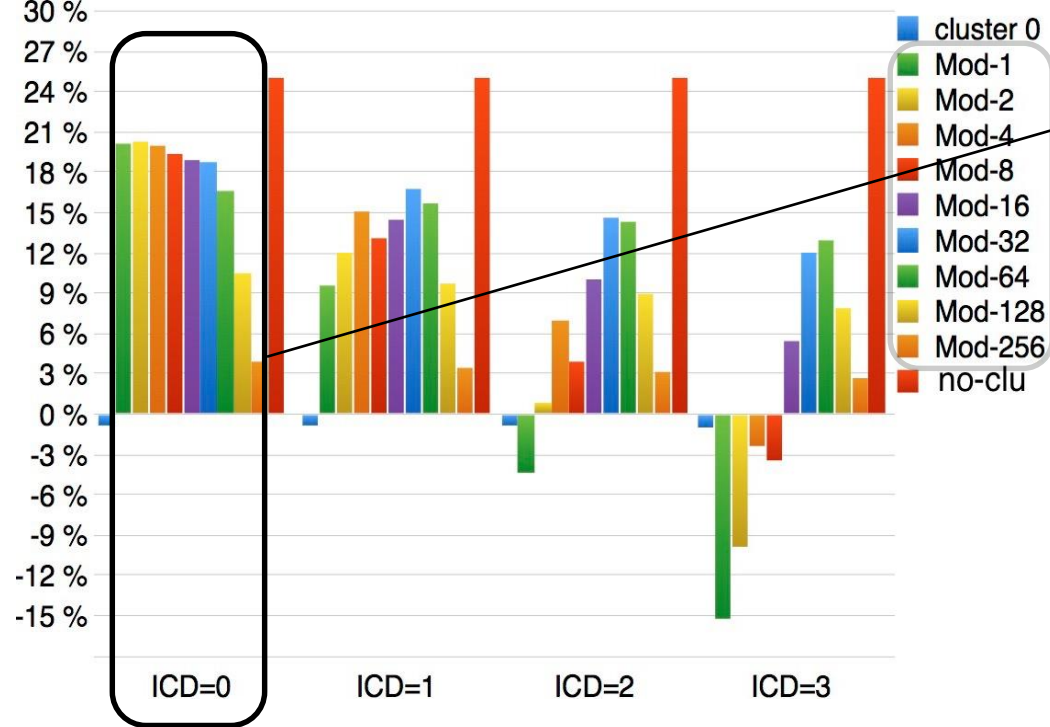

$N \leq 32$  achieves  
good balancing  
(ideal case)

incremental  
increase of  
Mod-N

# Dual Cluster Performance

IPC gain  
over  
baseline

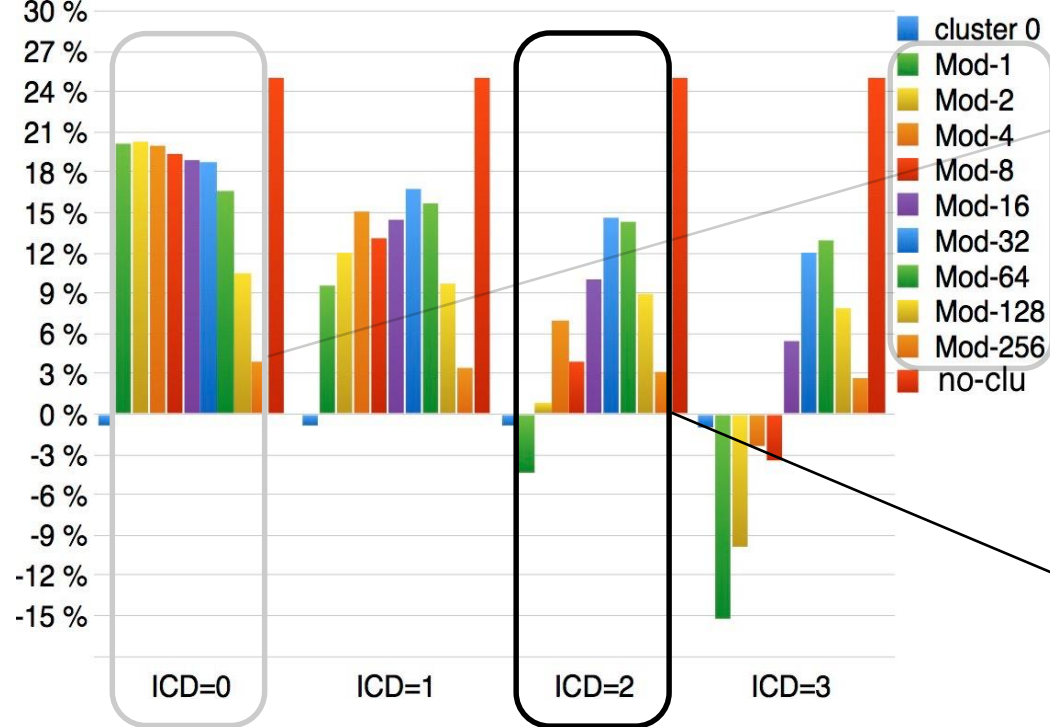

$N \leq 32$  achieves  
good balancing  
(ideal case)

incremental  
increase of  
Mod-N

IPC very sensitive  
to Mod-N  
(realistic case)



# Dual Cluster Performance

IPC gain  
over  
baseline

SPEC INT

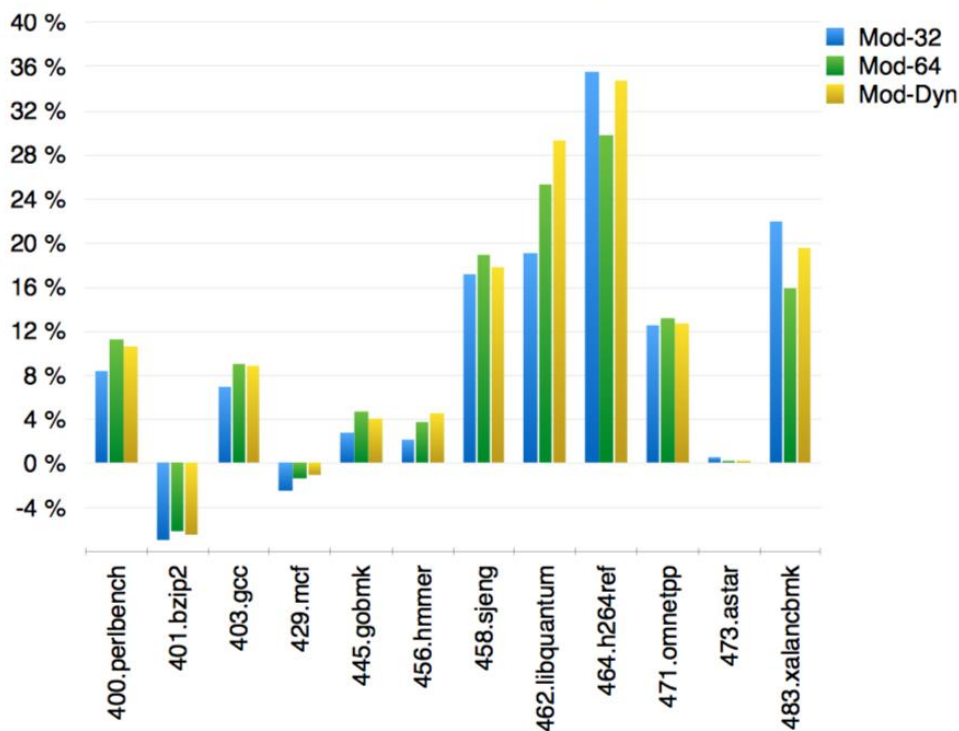

Intercluster Delay = 3 cycles

we could have an  
adaptive Mod-N

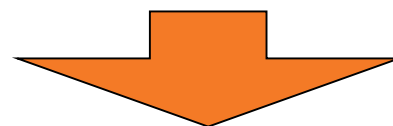

to find the best  
N dynamically

# Clustering: a different approach

## Past

- *increase clock freq*
- *narrow issue cluster*

**Speed Daemon**

## Future

- *constant clock freq*
- *exploit more ILP*
- *energy efficiency*
- *wide issue cluster*

**Brainiac**

# Clustering: Conclusions

## Past

- *increase clock freq*
- *narrow issue cluster*

+

- *best steering MOD-3*

## Future

- *constant clock freq*
- *exploit more ILP*
- *energy efficiency*
- *wide issue cluster*

+

- *best steering MOD-64*

# Thank you

P. Michaud, A. Mondelli, A. Sez nec, “Revisiting clustered microarchitecture for future superscalar cores: a case for wide-issue clusters”, ACM Transactions on Architecture and Code Optimization, Volume 12, Issue 3, August 2015.



*Inria*  
INVENTORS FOR THE DIGITAL WORLD

The logo for Inria, featuring the word "Inria" in a stylized, cursive font with a red-to-orange gradient, and the tagline "INVENTORS FOR THE DIGITAL WORLD" in a smaller, red, sans-serif font below it.
